# Supplementary material
Source: publisher figshare collection journal article supplement (https://tandf.figshare.com/articles/dataset/_/5245699)
Supplement: Supplementary file 2 [file 2]

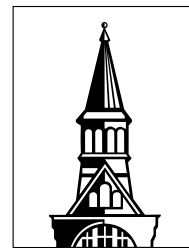

The University of Vermont

## Vermont Agricultural Resilience Initiative

Thank you for taking the time to fill out this survey. The goal of our project is to work with farmers, agricultural service providers, researchers and community organizations to address the impacts that extreme weather (like strong storms or long droughts) has had, and may have, on Vermont agriculture. How do changes in weather affect you as a farmer? What farming practices are you using and how do you choose them? Your input is extremely valuable to us!

This survey should take about 25 minutes to complete. It focuses on 1) farm characteristics; 2) farming practices; 3) how and why you make farm decisions; 4) nutrient management; 5) information on how weather and climate affect you; and 6) income and education information.

If you are not sure what a term or a practice means, please check the glossary located at the of the survey.

Your responses, name and identifying information will remain confidential.

As a **thank you** for completing this survey, we will donate \$5 to a food or farming organization of your choice.

### Section 1: Please tell us about your farm

1. How many years have you been farming? \_\_\_\_\_

2. Land usage for entire farm (in acres).

Owned

Leased

|                                                |       |       |
|------------------------------------------------|-------|-------|
| Pasture                                        | _____ | _____ |
| Hay                                            | _____ | _____ |
| Row crops/small grains/corn                    | _____ | _____ |
| Wetland                                        | _____ | _____ |
| Woodland pastured                              | _____ | _____ |
| Woodland not pastured                          | _____ | _____ |
| Vegetables/herbs                               | _____ | _____ |
| Tree fruits                                    | _____ | _____ |
| Small fruits                                   | _____ | _____ |
| Fallow                                         | _____ | _____ |
| Other (farm buildings, roads, wasteland, etc.) | _____ | _____ |
| TOTAL                                          | _____ | _____ |

3. What bodies of water do you have on your property? (check all that apply)

- |                                      |                                     |
|--------------------------------------|-------------------------------------|
| _____ No bodies of water on property | _____ Intermittent streams          |
| _____ Rivers                         | _____ Vernal pools                  |
| _____ Streams                        | _____ Ponds                         |
| _____ Creeks                         | _____ Other (please describe) _____ |

4. What value added enterprises do you implement on your farm? (check all that apply)

☐ Not applicable
 ☐ Events venue (e.g. weddings)

☐ Community Gatherings
 ☐ Agritourism

☐ Education
 ☐ Other(s)

5. In addition to your farm work, do you work off-farm at any point during the year? (check one)

☐ No
 ☐ Yes
 ☐ Not sure

6. What agricultural goods generate income on your farm?

| Product                                 | Percentage of Total Sales | Product                       | Percentage of Total Sales |
|-----------------------------------------|---------------------------|-------------------------------|---------------------------|
| Vegetables                              |                           | Dairy – cows                  |                           |
| Herbs                                   |                           | milkers                       |                           |
| Timber                                  |                           | heifers                       |                           |
| Maple Syrup                             |                           | calves                        |                           |
| Grains for human consumption            |                           | bulls                         |                           |
| Grains for livestock feed               |                           | Dairy – sheep                 |                           |
| Hay                                     |                           | Dairy – goat                  |                           |
| Tree Fruit (raw, not processed)         |                           | Meat – beef                   |                           |
| Small Fruit (raw, not processed)        |                           | Meat – pork                   |                           |
| Value added fruit or vegetable products |                           | Meat – chicken or other fowl  |                           |
| Bedding plants                          |                           | Meat – turkey                 |                           |
| Nursery Plants                          |                           | Meat – Goat                   |                           |
| Christmas trees                         |                           | Meat – lamb                   |                           |
| Sod                                     |                           | Wool – sheep                  |                           |
| Fluid Milk                              |                           | Eggs – chickens or other fowl |                           |
| Dairy products (other than fluid milk)  |                           | Other (please describe)       |                           |

7. Management type (check all that apply)

☐ Certified organic

☐ Organic, not certified

☐ Conventional

☐ Other

## Section 2: Please tell us about your farming practices

8. Which of the following practices do you currently implement on your farm? (check all that apply)

| Practice                                                                                                                                       | Practice                                                                              |
|------------------------------------------------------------------------------------------------------------------------------------------------|---------------------------------------------------------------------------------------|
| <input type="checkbox"/> Hoop houses/high tunnels                                                                                              | <input type="checkbox"/> Wetlands conservation                                        |
| <input type="checkbox"/> Green manures (crop residue incorporation into soil)                                                                  | <input type="checkbox"/> Nutrient management plan                                     |
| <input type="checkbox"/> Cover crops                                                                                                           | <input type="checkbox"/> Stormwater runoff management                                 |
| <input type="checkbox"/> Insurance (farm policies, crop insurance, product liability)                                                          | <input type="checkbox"/> Drainage tile                                                |
| <input type="checkbox"/> No till                                                                                                               | <input type="checkbox"/> Rotational grazing                                           |
| <input type="checkbox"/> Timely manure incorporation                                                                                           | <input type="checkbox"/> Animal diversity                                             |
| <input type="checkbox"/> Pest/disease management                                                                                               | <input type="checkbox"/> Animal feed management                                       |
| <input type="checkbox"/> Invasive species management                                                                                           | <input type="checkbox"/> Agroforestry (silvopasture, alley cropping, forest farming)  |
| <input type="checkbox"/> Irrigation (automated, drip, overhead)                                                                                | <input type="checkbox"/> Alternative energy (biomass, wind, solar, methane digesters) |
| <input type="checkbox"/> Conservation buffer strips (riparian buffers, wind breaks, stream corridors, buffer strips, shelter belts, hedgerows) | <input type="checkbox"/> Reduced tillage (zone, strip, keyline plowing, deep tillage) |

9. In the past year, have you noticed any on-farm water quality problems that have negatively affected your agricultural operations? (check all that apply)

|                                          |                                                        |
|------------------------------------------|--------------------------------------------------------|
| <input type="checkbox"/> Not applicable  | <input type="checkbox"/> Flooding                      |
| <input type="checkbox"/> Potability      | <input type="checkbox"/> Drought                       |
| <input type="checkbox"/> Soil compaction | <input type="checkbox"/> Poor drainage/soil saturation |
| <input type="checkbox"/> Nutrient loss   | <input type="checkbox"/> Other (please describe) _____ |
| <input type="checkbox"/> Erosion         |                                                        |

10. Have you applied minerals or soil-building amendments to your land within the last three years? (check all that apply)

|                                         |                                                        |
|-----------------------------------------|--------------------------------------------------------|
| <input type="checkbox"/> Not applicable | <input type="checkbox"/> Compost                       |
| <input type="checkbox"/> Wood ash       | <input type="checkbox"/> Other (please describe) _____ |
| <input type="checkbox"/> Lime           |                                                        |

11. Do you produce compost on your farm? (check one)

☐ No    ☐ Yes    ☐ Not sure

12. If you spread compost on your farm, where is it applied? (check all that apply)

|                                                          |                                                        |
|----------------------------------------------------------|--------------------------------------------------------|
| <input type="checkbox"/> No compost is spread on my farm | <input type="checkbox"/> Crop land                     |
| <input type="checkbox"/> Pastureland                     | <input type="checkbox"/> Produce land                  |
| <input type="checkbox"/> Hay land                        | <input type="checkbox"/> Not sure                      |
|                                                          | <input type="checkbox"/> Other (please describe) _____ |

13. What percentage of your land has received compost at least once in the last three years? \_\_\_\_\_

### Section 3: Please tell us about your use of Conservation Programs and Practices

14. There are many different conservation practices that farmers use.

Suppose an agency offered to pay you to implement conservation practices on your farm for one year. Payments would be offered on a per acre basis. Conservation practices may be offered singly or in groups. Which combination of practices would you be mostly likely to implement?

Consider each of the following combinations and rank them 1-7, with 1 being the one you are most likely to choose, and 7 being the one you are least likely to choose. Use each number only once.

Please refer to the back page for definitions of conservation practices if needed.

| RANK (1-7) | CONSERVATION PRACTICES                                                            | RANK (1-7) | CONSERVATION PRACTICES                                                                               |
|------------|-----------------------------------------------------------------------------------|------------|------------------------------------------------------------------------------------------------------|
| _____      | You will be paid \$30/acre to implement conservation tillage.                     | _____      | You will be paid \$170/acre to implement conservation buffers and conservation tillage.              |
| _____      | You will be paid \$90/acre to implement cover cropping.                           | _____      | You will be paid \$175/acre to implement cover crops and conservation buffer strips.                 |
| _____      | You will be paid \$105/acre to implement conservation buffers.                    | _____      | You will be paid \$205/acre to implement cover crops, conservation buffers and conservation tillage. |
| _____      | You will be paid \$120/acre to implement conservation tillage and cover cropping. |            |                                                                                                      |

15. Are you currently enrolled in any federal government conservation programs? (check all that apply)

| Conservation Program                                               | Mark if applicable | What practices did you implement as a result of participation in this program? | Would you have used these practices without this program? (Y, N, Not sure) |
|--------------------------------------------------------------------|--------------------|--------------------------------------------------------------------------------|----------------------------------------------------------------------------|
| I am not enrolled in any federal government conservation programs. | _____              | _____                                                                          | _____                                                                      |
| Wildlife Habitat Incentives Program (WHIP)                         | _____              | _____                                                                          | _____                                                                      |
| Environmental Quality Incentive Program (EQIP)                     | _____              | _____                                                                          | _____                                                                      |
| Conservation Reserve Enhancement Program (CREP)                    | _____              | _____                                                                          | _____                                                                      |
| Farm and Ranch Lands Protection Program (FRPP)                     | _____              | _____                                                                          | _____                                                                      |
| Agricultural Management Assistance (AMA)                           | _____              | _____                                                                          | _____                                                                      |
| Conservation Technical Assistance (CTA)                            | _____              | _____                                                                          | _____                                                                      |
| Participate in programs but can't remember which ones              | _____              | _____                                                                          | _____                                                                      |
| Current Use Program                                                | _____              | _____                                                                          | _____                                                                      |
| Conservation Security Program (CSP)                                | _____              | _____                                                                          | _____                                                                      |
| Other (please describe)                                            | _____              | _____                                                                          | _____                                                                      |

16. What is your top reason for enrolling/participating in the programs? Please rank from 1-5, with 1 being your top reason. Use each number only once.

|                                         |                                                      |
|-----------------------------------------|------------------------------------------------------|
| _____ Not applicable                    | _____ Help with farm management issues (e.g. manure) |
| _____ Financial compensation            | _____ Benefiting your community and landscape        |
| _____ Conservation/environmental health | _____ Other (please identify) _____                  |

17. Do you have a conservation easement on your property? (check one)

\_\_\_\_\_ No      \_\_\_\_\_ Yes      \_\_\_\_\_ Not sure

18. If you answered “yes” to question 17, through which organization? \_\_\_\_\_

#### Section 4: Please tell us about how weather and climate affect you

19. In your opinion, are there more extreme weather events now than 10 years ago? (check one)

\_\_\_\_\_ No      \_\_\_\_\_ Yes      \_\_\_\_\_ Not sure

20. Over the past 10 years, damage from heavy rain has:

\_\_\_\_\_ Decreased a great deal      \_\_\_\_\_ Increased slightly  
\_\_\_\_\_ Decreased slightly      \_\_\_\_\_ Increased a great deal  
\_\_\_\_\_ No change      \_\_\_\_\_ Not sure

21. A heavy rain event will \_\_\_\_\_. (check one statement below to complete sentence)

\_\_\_\_\_ Have a strongly net positive impact on my farm      \_\_\_\_\_ Have a negative net impact on my farm  
\_\_\_\_\_ Have a positive net impact on my farm      \_\_\_\_\_ Have a strongly negative net impact on my farm  
\_\_\_\_\_ Have no net impact on my farm      \_\_\_\_\_ Not sure

22. In your opinion, do extreme temperatures occur more often than they did 10 years ago? (check one)

\_\_\_\_\_ No      \_\_\_\_\_ Yes      \_\_\_\_\_ Not sure

23. Increasing extreme temperature events will \_\_\_\_\_. (check one statement below to complete sentence)

\_\_\_\_\_ Have a strongly net positive impact on my farm      \_\_\_\_\_ Have a negative net impact on my farm  
\_\_\_\_\_ Have a positive net impact on my farm      \_\_\_\_\_ Have a strongly negative net impact on my farm  
\_\_\_\_\_ Have no net impact on my farm      \_\_\_\_\_ Not sure

24. In your opinion, is seasonal drought more frequent now than 10 years ago? (check one)

\_\_\_\_\_ No      \_\_\_\_\_ Yes      \_\_\_\_\_ Not sure

25. A drought event will \_\_\_\_\_. (check one statement below to complete sentence)

\_\_\_\_\_ Have a strongly net positive impact on my farm      \_\_\_\_\_ Have a negative net impact on my farm  
\_\_\_\_\_ Have a positive net impact on my farm      \_\_\_\_\_ Have a strongly negative net impact on my farm  
\_\_\_\_\_ Have no net impact on my farm      \_\_\_\_\_ Not sure

26. In your opinion, is the climate changing? (check one)

\_\_\_\_\_ No (skip to question 28)      \_\_\_\_\_ Yes      \_\_\_\_\_ Not sure

27. If you believe the climate is changing, do you believe this will affect your farm in a negative way? (check one)

\_\_\_\_\_ No      \_\_\_\_\_ Yes      \_\_\_\_\_ Not sure

28. How often do you make management decisions in response to weather events? (check one)

\_\_\_\_\_ Daily      \_\_\_\_\_ Monthly      \_\_\_\_\_ Seasonally  
\_\_\_\_\_ Weekly      \_\_\_\_\_ Yearly      \_\_\_\_\_ Not sure

29. How often do you make management decisions in response to a changing climate? (check one)

\_\_\_\_\_ Daily      \_\_\_\_\_ Monthly      \_\_\_\_\_ Seasonally  
 \_\_\_\_\_ Weekly      \_\_\_\_\_ Yearly      \_\_\_\_\_ Not sure

### Section 5: Please tell us about your current and future use of Nutrient Management Plans

At first, the connection between climate change and nutrient management plans may not appear obvious. We believe, however, that there is a strong connection. Thank you for taking the time to fill out the following section.

30. In the past three years, have you implemented a Nutrient Management Plan for reducing phosphorus and/or nitrogen outflows from or inflows to your farm?

A Nutrient Management Plan may be formal (through an agency) or informal (designed and implemented by you.) (check one)

\_\_\_\_\_ No (skip to question 33)      \_\_\_\_\_ Yes (approved by an Agency)      \_\_\_\_\_ Yes (not approved by an Agency)      \_\_\_\_\_ Not sure

31. For each component of your Nutrient Management Plan, please circle the extent to which you adopted each practice in the past 3 years:

Use the following numbers in the extent of adoption column:

0= no adoption

1=adopted at one quarter of full capacity

2=adopted at half of full capacity

3=adopted at three quarters of full capacity

4=adopted at full capacity

| PRACTICE                                                                     | EXTENT OF ADOPTION (0-4) |   |   |   |   |
|------------------------------------------------------------------------------|--------------------------|---|---|---|---|
|                                                                              | 0                        | 1 | 2 | 3 | 4 |
| Planned crop rotations                                                       | 0                        | 1 | 2 | 3 | 4 |
| Soil test at least every 3 years                                             | 0                        | 1 | 2 | 3 | 4 |
| Strip Cropping                                                               | 0                        | 1 | 2 | 3 | 4 |
| N, P, & K applications at rates recommended by soil tests                    | 0                        | 1 | 2 | 3 | 4 |
| Buffers at field edges                                                       | 0                        | 1 | 2 | 3 | 4 |
| Cover cropping                                                               | 0                        | 1 | 2 | 3 | 4 |
| Reduced tillage (strip, zone, and no)                                        | 0                        | 1 | 2 | 3 | 4 |
| Applying manure at recommended rates and times                               | 0                        | 1 | 2 | 3 | 4 |
| Applying fertilizer at recommended rates                                     | 0                        | 1 | 2 | 3 | 4 |
| Incorporating manure and fertilizer as quickly as possible after application | 0                        | 1 | 2 | 3 | 4 |
| Manure spreading setbacks (from water bodies and private/public wells)       | 0                        | 1 | 2 | 3 | 4 |

32. How do you feel (very bad, neutral, or very good) about the adoption of the following (new or existing) nutrient management practices for your farming operation in the next one to three years? Please circle each practice on a scale from “very good” (1) to “very bad” (7):

|                                                                              | Very Good |   |   | Neutral |   | Very Bad |   |     |
|------------------------------------------------------------------------------|-----------|---|---|---------|---|----------|---|-----|
|                                                                              | 1         | 2 | 3 | 4       | 5 | 6        | 7 |     |
| Planned crop rotations                                                       | 1         | 2 | 3 | 4       | 5 | 6        | 7 | N/A |
| Soil test at least once every 3 years                                        | 1         | 2 | 3 | 4       | 5 | 6        | 7 | N/A |
| Strip cropping                                                               | 1         | 2 | 3 | 4       | 5 | 6        | 7 | N/A |
| N,P and K application at rates recommended by soil tests                     | 1         | 2 | 3 | 4       | 5 | 6        | 7 | N/A |
| Buffers at edge of field                                                     | 1         | 2 | 3 | 4       | 5 | 6        | 7 | N/A |
| Cover cropping                                                               | 1         | 2 | 3 | 4       | 5 | 6        | 7 | N/A |
| Reduced tillage                                                              | 1         | 2 | 3 | 4       | 5 | 6        | 7 | N/A |
| Fertilizer application at recommended rates                                  | 1         | 2 | 3 | 4       | 5 | 6        | 7 | N/A |
| Incorporating manure and fertilizer as quickly as possible after application | 1         | 2 | 3 | 4       | 5 | 6        | 7 | N/A |
| Manure spreading setbacks from water bodies and wells                        | 1         | 2 | 3 | 4       | 5 | 6        | 7 | N/A |

33. The next question is designed to help us understand who (friends and/or family, neighbors, or other farmers) may most strongly influence your decision to adopt conservation practices.

Under each conservation practice, please tell us how strongly you agree or disagree that friends and family, neighbors, or other farmers think you should adopt that practice, if applicable.

If no one influences your decisions, you can choose “not applicable” (N/A).

#### PLANNED CROP ROTATIONS

|                                                   | Strongly agree |   |   | Neutral |   | Strongly disagree |   |     |
|---------------------------------------------------|----------------|---|---|---------|---|-------------------|---|-----|
| Your friends and/or family think you should adopt | 1              | 2 | 3 | 4       | 5 | 6                 | 7 | N/A |
| Your neighbors think you should adopt             | 1              | 2 | 3 | 4       | 5 | 6                 | 7 | N/A |
| Other farmers think you should adopt              | 1              | 2 | 3 | 4       | 5 | 6                 | 7 | N/A |

#### SOIL TESTS AT LEAST ONCE EVERY 3 YEARS

|                                                   | Strongly agree |   |   | Neutral |   | Strongly disagree |   |     |
|---------------------------------------------------|----------------|---|---|---------|---|-------------------|---|-----|
| Your friends and/or family think you should adopt | 1              | 2 | 3 | 4       | 5 | 6                 | 7 | N/A |
| Your neighbors think you should adopt             | 1              | 2 | 3 | 4       | 5 | 6                 | 7 | N/A |
| Other farmers think you should adopt              | 1              | 2 | 3 | 4       | 5 | 6                 | 7 | N/A |

#### STRIP CROPPING

|                                                   | Strongly agree |   |   | Neutral |   | Strongly disagree |   |     |
|---------------------------------------------------|----------------|---|---|---------|---|-------------------|---|-----|
| Your friends and/or family think you should adopt | 1              | 2 | 3 | 4       | 5 | 6                 | 7 | N/A |
| Your neighbors think you should adopt             | 1              | 2 | 3 | 4       | 5 | 6                 | 7 | N/A |
| Other farmers think you should adopt              | 1              | 2 | 3 | 4       | 5 | 6                 | 7 | N/A |

#### N,P AND K APPLICATION AT RATES RECOMMENDED BY SOIL TESTS

|                                                   | Strongly agree |   |   | Neutral |   | Strongly disagree |   |     |
|---------------------------------------------------|----------------|---|---|---------|---|-------------------|---|-----|
| Your friends and/or family think you should adopt | 1              | 2 | 3 | 4       | 5 | 6                 | 7 | N/A |
| Your neighbors think you should adopt             | 1              | 2 | 3 | 4       | 5 | 6                 | 7 | N/A |
| Other farmers think you should adopt              | 1              | 2 | 3 | 4       | 5 | 6                 | 7 | N/A |

#### BUFFERS AT THE EDGE OF FIELDS

|                                                   | Strongly agree |   |   | Neutral |   | Strongly disagree |   |     |
|---------------------------------------------------|----------------|---|---|---------|---|-------------------|---|-----|
| Your friends and/or family think you should adopt | 1              | 2 | 3 | 4       | 5 | 6                 | 7 | N/A |
| Your neighbors think you should adopt             | 1              | 2 | 3 | 4       | 5 | 6                 | 7 | N/A |
| Other farmers think you should adopt              | 1              | 2 | 3 | 4       | 5 | 6                 | 7 | N/A |

#### COVER CROPPING

|                                                   | Strongly agree |   |   | Neutral |   | Strongly disagree |   |     |
|---------------------------------------------------|----------------|---|---|---------|---|-------------------|---|-----|
| Your friends and/or family think you should adopt | 1              | 2 | 3 | 4       | 5 | 6                 | 7 | N/A |
| Your neighbors think you should adopt             | 1              | 2 | 3 | 4       | 5 | 6                 | 7 | N/A |
| Other farmers think you should adopt              | 1              | 2 | 3 | 4       | 5 | 6                 | 7 | N/A |

#### REDUCED TILLAGE

|                                                   | Strongly agree |   |   | Neutral |   | Strongly disagree |   |     |
|---------------------------------------------------|----------------|---|---|---------|---|-------------------|---|-----|
| Your friends and/or family think you should adopt | 1              | 2 | 3 | 4       | 5 | 6                 | 7 | N/A |
| Your neighbors think you should adopt             | 1              | 2 | 3 | 4       | 5 | 6                 | 7 | N/A |
| Other farmers think you should adopt              | 1              | 2 | 3 | 4       | 5 | 6                 | 7 | N/A |

#### FERTILIZER APPLICATION AT THE RECOMMENDED RATES

|                                                   | Strongly agree |   |   | Neutral |   | Strongly disagree |   |     |
|---------------------------------------------------|----------------|---|---|---------|---|-------------------|---|-----|
| Your friends and/or family think you should adopt | 1              | 2 | 3 | 4       | 5 | 6                 | 7 | N/A |
| Your neighbors think you should adopt             | 1              | 2 | 3 | 4       | 5 | 6                 | 7 | N/A |
| Other farmers think you should adopt              | 1              | 2 | 3 | 4       | 5 | 6                 | 7 | N/A |

**INCORPORATING MANURE AND FERTILIZER AS QUICKLY AS POSSIBLE AFTER APPLICATION**

|                                                   | <b>Strongly agree</b> |   |   | <b>Neutral</b> |   | <b>Strongly disagree</b> |   |     |
|---------------------------------------------------|-----------------------|---|---|----------------|---|--------------------------|---|-----|
| Your friends and/or family think you should adopt | 1                     | 2 | 3 | 4              | 5 | 6                        | 7 | N/A |
| Your neighbors think you should adopt             | 1                     | 2 | 3 | 4              | 5 | 6                        | 7 | N/A |
| Other farmers think you should adopt              | 1                     | 2 | 3 | 4              | 5 | 6                        | 7 | N/A |

**MANURE SPREADING SETBACKS FROM WATER BODIES AND WELLS**

|                                                   | <b>Strongly agree</b> |   |   | <b>Neutral</b> |   | <b>Strongly disagree</b> |   |     |
|---------------------------------------------------|-----------------------|---|---|----------------|---|--------------------------|---|-----|
| Your friends and/or family think you should adopt | 1                     | 2 | 3 | 4              | 5 | 6                        | 7 | N/A |
| Your neighbors think you should adopt             | 1                     | 2 | 3 | 4              | 5 | 6                        | 7 | N/A |
| Other farmers think you should adopt              | 1                     | 2 | 3 | 4              | 5 | 6                        | 7 | N/A |

34. How confident are you in being able to adopt/continue implementing the following Nutrient Management Practices? Circle each practice on a scale from highly confident (1) to no confidence (7):

|                                                                              | <b>Highly confident</b> |   |   |   |   | <b>No confidence</b> |   |     |
|------------------------------------------------------------------------------|-------------------------|---|---|---|---|----------------------|---|-----|
| Planned crop rotations                                                       | 1                       | 2 | 3 | 4 | 5 | 6                    | 7 | N/A |
| Soil test at least once every 3 years                                        | 1                       | 2 | 3 | 4 | 5 | 6                    | 7 | N/A |
| Strip cropping                                                               | 1                       | 2 | 3 | 4 | 5 | 6                    | 7 | N/A |
| N,P and K application at rates recommended by soil tests                     | 1                       | 2 | 3 | 4 | 5 | 6                    | 7 | N/A |
| Buffers at edge of field                                                     | 1                       | 2 | 3 | 4 | 5 | 6                    | 7 | N/A |
| Cover cropping                                                               | 1                       | 2 | 3 | 4 | 5 | 6                    | 7 | N/A |
| Reduced tillage                                                              | 1                       | 2 | 3 | 4 | 5 | 6                    | 7 | N/A |
| Fertilizer application at recommended rates                                  | 1                       | 2 | 3 | 4 | 5 | 6                    | 7 | N/A |
| Incorporating manure and fertilizer as quickly as possible after application | 1                       | 2 | 3 | 4 | 5 | 6                    | 7 | N/A |
| Manure spreading setbacks from water bodies and wells                        | 1                       | 2 | 3 | 4 | 5 | 6                    | 7 | N/A |

35. If you do not already use the following practices, do you intend to adopt them in the next three years? Circle for each practice on a scale from highly likely (1) to highly unlikely (7).

| <b>PRACTICE</b>                                                              | <b>I already use this practice (y/n)</b> | <b>If No, please fill out this column</b> |   |   |   |   |                 |   |     |
|------------------------------------------------------------------------------|------------------------------------------|-------------------------------------------|---|---|---|---|-----------------|---|-----|
|                                                                              |                                          | <b>Highly likely</b>                      |   |   |   |   | <b>Unlikely</b> |   |     |
| Planned crop rotations                                                       | _____                                    | 1                                         | 2 | 3 | 4 | 5 | 6               | 7 | N/A |
| Soil test at least every 3 years                                             | _____                                    | 1                                         | 2 | 3 | 4 | 5 | 6               | 7 | N/A |
| Strip Cropping                                                               | _____                                    | 1                                         | 2 | 3 | 4 | 5 | 6               | 7 | N/A |
| N, P, & K applications at rates recommended by soil tests                    | _____                                    | 1                                         | 2 | 3 | 4 | 5 | 6               | 7 | N/A |
| Buffers at field edges                                                       | _____                                    | 1                                         | 2 | 3 | 4 | 5 | 6               | 7 | N/A |
| Cover cropping                                                               | _____                                    | 1                                         | 2 | 3 | 4 | 5 | 6               | 7 | N/A |
| Reduced tillage                                                              | _____                                    | 1                                         | 2 | 3 | 4 | 5 | 6               | 7 | N/A |
| Fertilizer application at recommended rates                                  | _____                                    | 1                                         | 2 | 3 | 4 | 5 | 6               | 7 | N/A |
| Applying fertilizer at recommended rates                                     | _____                                    | 1                                         | 2 | 3 | 4 | 5 | 6               | 7 | N/A |
| Incorporating manure and fertilizer as quickly as possible after application | _____                                    | 1                                         | 2 | 3 | 4 | 5 | 6               | 7 | N/A |
| Manure spreading setbacks from water bodies and wells                        | _____                                    | 1                                         | 2 | 3 | 4 | 5 | 6               | 7 | N/A |



**Section 6: Please tell us about yourself – your information will be kept confidential**

36. What percent of your household income is generated from the farm? \_\_\_\_\_

37. What was the **gross** income from your farm in 2011? (check one)

|                           |                           |
|---------------------------|---------------------------|
| _____ \$0-\$9,999         | _____ \$100,000-\$124,999 |
| _____ \$10,000 - \$24,999 | _____ \$125,000-\$149,999 |
| _____ \$25,000 - \$49,999 | _____ \$150,000-\$174,999 |
| _____ \$50,000 - \$74,999 | _____ \$175,000-\$199,999 |
| _____ \$75,000-\$99,999   | _____ \$200,000+          |

38. What was the net income for your farm in 2011? (check one)

|                                |                           |
|--------------------------------|---------------------------|
| _____ Less than \$0 (net loss) | _____ \$100,000-\$124,999 |
| _____ \$0-\$9,999              | _____ \$125,000-\$149,999 |
| _____ \$10,000 - \$24,999      | _____ \$150,000-\$174,999 |
| _____ \$25,000 - \$49,999      | _____ \$175,000-\$199,999 |
| _____ \$50,000 - \$74,999      | _____ \$200,000+          |
| _____ \$75,000-\$99,999        |                           |

39. In what year were you born? (check one)

|                 |                 |
|-----------------|-----------------|
| _____ 1910-1919 | _____ 1960-1969 |
| _____ 1920-1929 | _____ 1970-1979 |
| _____ 1930-1939 | _____ 1980-1989 |
| _____ 1940-1949 | _____ 1990-1999 |
| _____ 1950-1959 |                 |

40. Highest level of education achieved? (check one)

|                              |                          |
|------------------------------|--------------------------|
| _____ Some high school       | _____ Associate's Degree |
| _____ High school degree/GED | _____ Bachelor's Degree  |
| _____ Some college           | _____ Graduate Degree    |

41. What is your zipcode? \_\_\_\_\_

42. In appreciation, we will donate \$5 to an agriculture or food organization of your choice. (check one)

|                                                           |                                             |
|-----------------------------------------------------------|---------------------------------------------|
| _____ The Vermont Foodbank                                | _____ Rural Vermont                         |
| _____ The Vermont Vegetable and Berry Growers Association | _____ The Vermont Grass Farmers Association |
| _____ The Vermont Dairy Promotions Council                | _____ Other(please name) _____              |
| _____ NOFA Vermont                                        |                                             |

43. This survey is phase one of a multiphase project. Phase 2 of this project will focus on farms that adopt certain practices and the in-depth financial and environmental impacts of these practices. Farms that participate in Phase 2 would receive modest financial compensation in addition to valuable information about the impact of farm practices.

Would you be willing to participate in later phases of this research?

\_\_\_\_\_ Yes (please provide your contact information below)

\_\_\_\_\_ No

\_\_\_\_\_ Not sure

If you want to learn more about our project, please provide your contact information. This information will be kept separate from your survey responses.

Name: \_\_\_\_\_

Address: \_\_\_\_\_

Email: \_\_\_\_\_

**Thank you for finishing the survey!**

If you have concerns or wish to learn more about our work,  
contact Kate Westdijk at [katherine.westdijk@uvm.edu](mailto:katherine.westdijk@uvm.edu), or 802-656-0409.

## Glossary Definitions

|                                      |                                                                                                                                                                                                                                                                                                                                                                                                                                                                                                                                                |
|--------------------------------------|------------------------------------------------------------------------------------------------------------------------------------------------------------------------------------------------------------------------------------------------------------------------------------------------------------------------------------------------------------------------------------------------------------------------------------------------------------------------------------------------------------------------------------------------|
| <b>Adaptation:</b>                   | Planning for the changes that are expected to occur as a result of climate change. <i>(EPA)</i>                                                                                                                                                                                                                                                                                                                                                                                                                                                |
| <b>Agroforestry:</b>                 | Agroforestry intentionally combines agriculture and forestry to create integrated and sustainable land-use systems. Agroforestry takes advantage of the interactive benefits from combining trees and shrubs with crops and/or livestock. <i>(USDA National Agroforestry Center)</i>                                                                                                                                                                                                                                                           |
| <b>Animal Feed Management:</b>       | Feeding a balanced diet, avoiding overfeeding, and providing abundant supplies of cool, clean, and pure water will help to optimize feed and nutrient use on an animal farm. <i>(UVM Extension, eXtension)</i>                                                                                                                                                                                                                                                                                                                                 |
| <b>Conservation buffers:</b>         | Strips of land maintained in permanent vegetation. These buffers can be used in a systems approach to manage soil, water, nutrients, and pesticides for sustainable agricultural production, while minimizing environmental impact <i>(NRCS)</i>                                                                                                                                                                                                                                                                                               |
| <b>Conservation tillage:</b>         | A number of strategies and techniques for establishing crops in the previous crop's residues, which are purposely left on the soil surface. The principal benefits of conservation tillage are improved water conservation and the reduction of soil erosion. Additional potential benefits include reduced fuel consumption, planting and harvesting flexibility, reduced labor requirements, and improved soil tilth. Two of the most common conservation tillage systems are zone tillage and no-till <i>(ATTRA)</i>                        |
| <b>Cover crops:</b>                  | Crops, including grasses, legumes, and forbs, used to provide vegetative cover for natural resource protection and improvement. <i>(USDA)</i>                                                                                                                                                                                                                                                                                                                                                                                                  |
| <b>Deep zone tillage:</b>            | Deep zone tillage uses a 5-inch-wide tilled strip to simultaneously break up plow pans, warm the soil and prepare a seedbed. A deep shank or subsoiler (zone-builder) breaks up the plow-pan while fluted coulters cut and prepare a strip in the killed residue/cover crop, and rolling baskets help break up soil clods to prepare the narrow seedbed. <i>(University of Connecticut)</i>                                                                                                                                                    |
| <b>Drainage tile:</b>                | A type of subsurface drainage used in areas with moist soils or the experience standing water. The purpose of subsurface drainage is to lower the water table in the soil. The water table is the level at which the soil is entirely saturated with water. The excess water must be removed to a level below the ground surface where it will not interfere with plant root growth and development. <i>(Iowa State University)</i>                                                                                                            |
| <b>Green Manure:</b>                 | The term "green manure" refers to cover crops that are tilled into the soil. Green manures are mainly grown to increase soil organic matter (OM). <i>(NRCS)</i>                                                                                                                                                                                                                                                                                                                                                                                |
| <b>Hoop Houses/High Tunnels:</b>     | A seasonal tunnel system is a polyethylene (plastic) covered structure that is used to cover crops to extend the growing season. They are also known as high tunnels, hoop houses, or cold tunnels. They are used to extend the growing season for crops by approximately two to three weeks on each end of the season by increasing the temperature surrounding the crop and minimizing the heat loss during the night. <i>(NRCS)</i>                                                                                                         |
| <b>Keyline plowing:</b>              | Keyline plowing can help alleviate compaction and has been reported to help improve soil quality and build organic matter. The thin, cast shanks (~3/4") and coulter wheels of the Yeomans' Keyline subsoil plow aerate subsoil while causing minimal disruption to the pasture surface. <i>(University of Vermont)</i>                                                                                                                                                                                                                        |
| <b>Mitigation:</b>                   | Mitigation refers to technological change and substitution that reduce energy resource inputs and emissions per unit of output. Specific to climate change, mitigation encompasses implementing policies and practices to reduce greenhouse gas emissions and to enhance sinks (IPCC, 2001).                                                                                                                                                                                                                                                   |
| <b>No till:</b>                      | No-till cropping systems are based on the concept of keeping the soil covered at all times. They include the use of crop rotations, cover cropping, and planting into a seed slot created by coulters. <i>(NRCS)</i>                                                                                                                                                                                                                                                                                                                           |
| <b>Nutrient management plan:</b>     | Established plan for managing the amount (rate), source, placement (method of application), and timing of plant nutrients and soil amendments. Benefits include nutrient conservation and improved air, water, and soil quality. This practice applies to all lands where plant nutrients and soil amendments are applied. This standard does not apply to one-time nutrient applications to establish perennial crops. <i>(USDA)</i>                                                                                                          |
| <b>Rotational Grazing:</b>           | Exposing animals to limited grazing areas for set periods of time, then providing adequate periods of rest for the grass. The system requires careful management to ensure that animals do not trample or eat grass so close to the ground that its regrowth is hampered. It is sometimes called "prescribed" if grazing systems are set up in advance, paddocks are numbered, and movement of the animals progresses in a prescribed order. <i>(UVM Center for Sustainable Agriculture)</i>                                                   |
| <b>Stormwater runoff management:</b> | Stormwater runoff is generated when precipitation from rain and snowmelt events flows over land or impervious surfaces and does not percolate into the ground. As the runoff flows over the land or impervious surfaces (paved streets, parking lots, and building rooftops), it accumulates debris, chemicals, sediment or other pollutants that could adversely affect water quality if the runoff is discharged untreated. The primary method to control stormwater discharges is the use of best management practices (BMPs). <i>(EPA)</i> |
| <b>Wetlands conservation:</b>        | Protecting wetlands, wildlife habitat, soil, water, and related natural resources in an environmentally beneficial and cost effective manner. <i>(USDA)</i>                                                                                                                                                                                                                                                                                                                                                                                    |
